# Supplementary material for: Highly selective naked eye detection of vitamin B1 in the presence of other vitamins using graphene quantum dots capped gold nanoparticles
Source: Royal Society of Chemistry journal article supplement (doi:10.1039/c8nj05734f), 2018-12-27
Supplement: c8nj05734f1.pdf [file c8nj05734f1.pdf]

**Highly selective naked eye detection of vitamin B1 in the presence of other vitamins using graphene quantum dots capped gold nanoparticles**

**B. Sinduja and S. Abraham John\***

Centre for Nanoscience and Nanotechnology  
Department of Chemistry, The Gandhigram Rural Institute  
Gandhigram – 624 302, Dindigul, India.

---

\*Corresponding author: Tel: +91 451 245 2371 ; Fax : + 91 451 245 3031

E-mail : [abrajohn@yahoo.co.in](mailto:abrajohn@yahoo.co.in); [s.abrahamjohn@ruraluniv.ac.in](mailto:s.abrahamjohn@ruraluniv.ac.in)

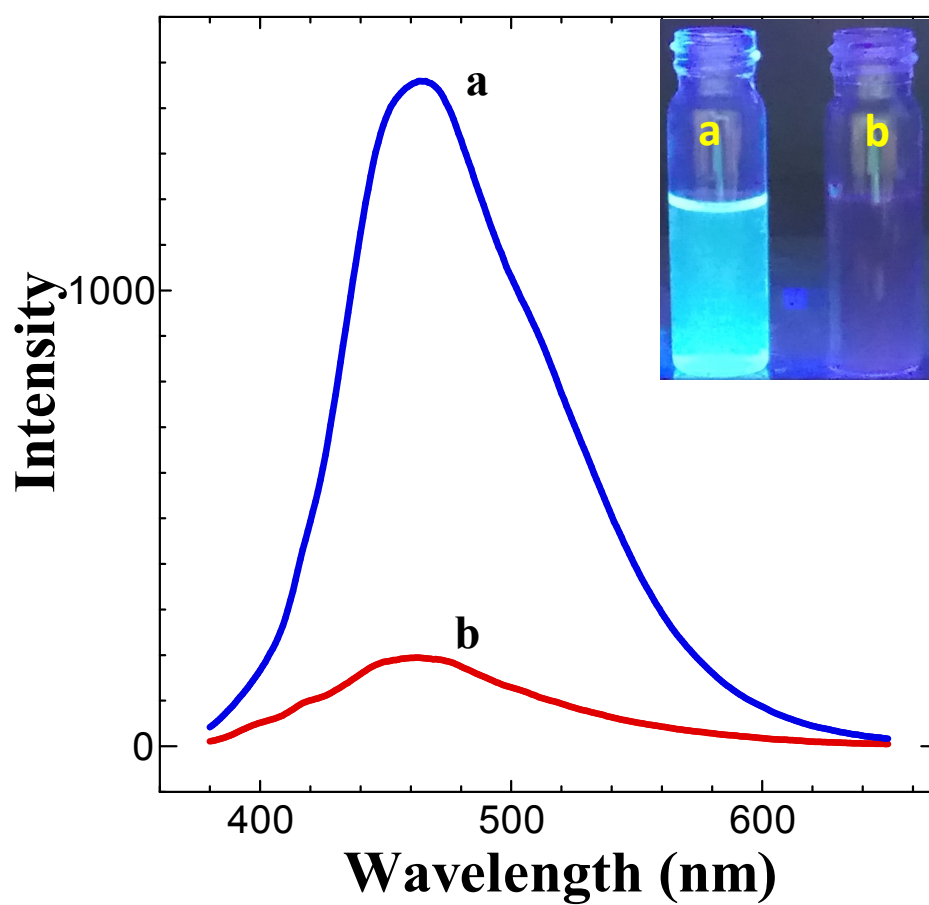

**Fig. S1.** Emission spectra of (a) GQDs and (b) Au-GQDs. Inset: photographs of GQDs and Au-GQDs under UV illumination.

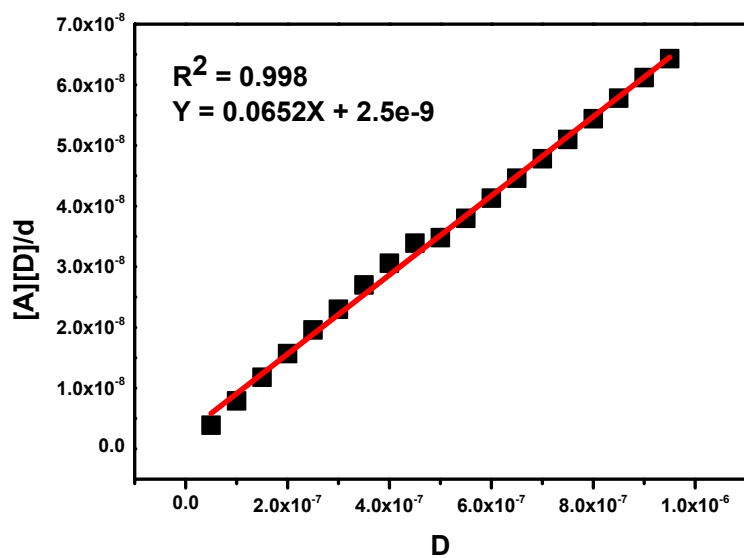

**Fig. S2.** Association constant plot for spectrophotometric determination of thiamine using Au-GQDs.

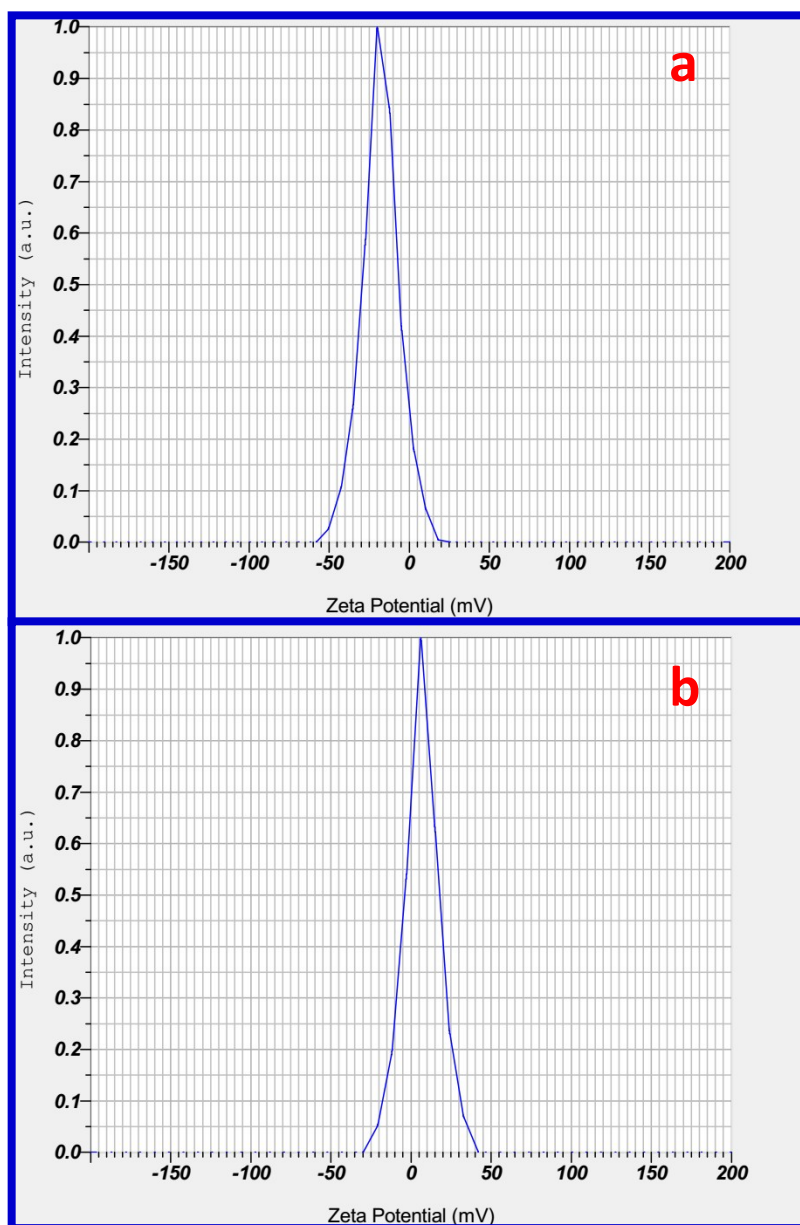

**Fig. S3.** Zeta potential graphs of (a) Au-GQDs + 0.5  $\mu\text{M}$  and (b) 0.5  $\mu\text{M}$  thiamine

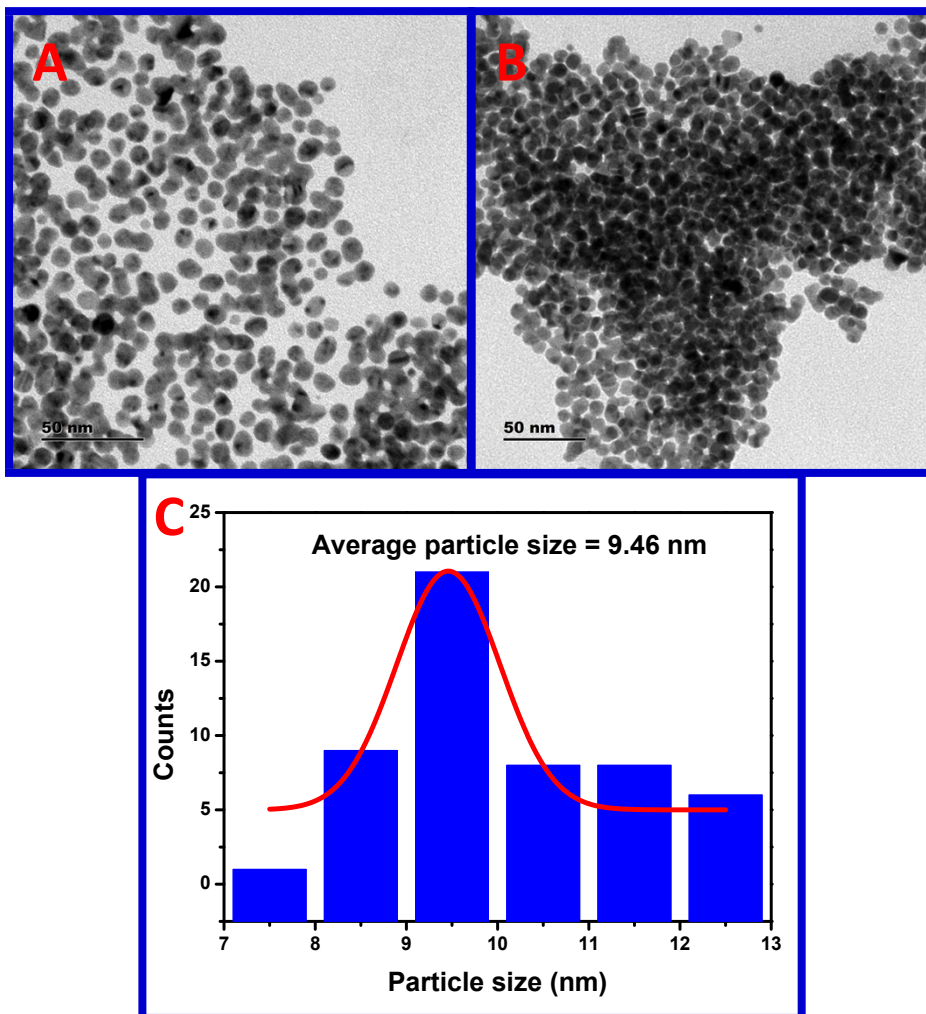

**Fig. S4.** HR-TEM images of Au-GQDs: (A) before (B) after the addition of thiamine and (C) particle size distribution in the presence of thiamine.

**Table S1**

Determination of thiamine in blood serum samples

| <b>Blood serum</b> | <b>Thiamine<br/>added<br/><math>\mu\text{M}</math></b> | <b>Thiamine<br/>found<br/><math>\mu\text{M}</math></b> | <b>Recovery<br/>(%)</b> |
|--------------------|--------------------------------------------------------|--------------------------------------------------------|-------------------------|
| Sample 1           | -                                                      | -                                                      | -                       |
| Sample 2           | 3                                                      | 2.98                                                   | 99.3                    |
| Sample 3           | 6                                                      | 5.97                                                   | 99.5                    |
| Sample 4           | 9                                                      | 8.93                                                   | 99.2                    |
